# Supplementary material
Source: Springer Nature journal article supplement (https://www.springermedizin.de/resource/supplementary/12967_2011_791_MOESM3_ESM.pdf/9577070)

**A**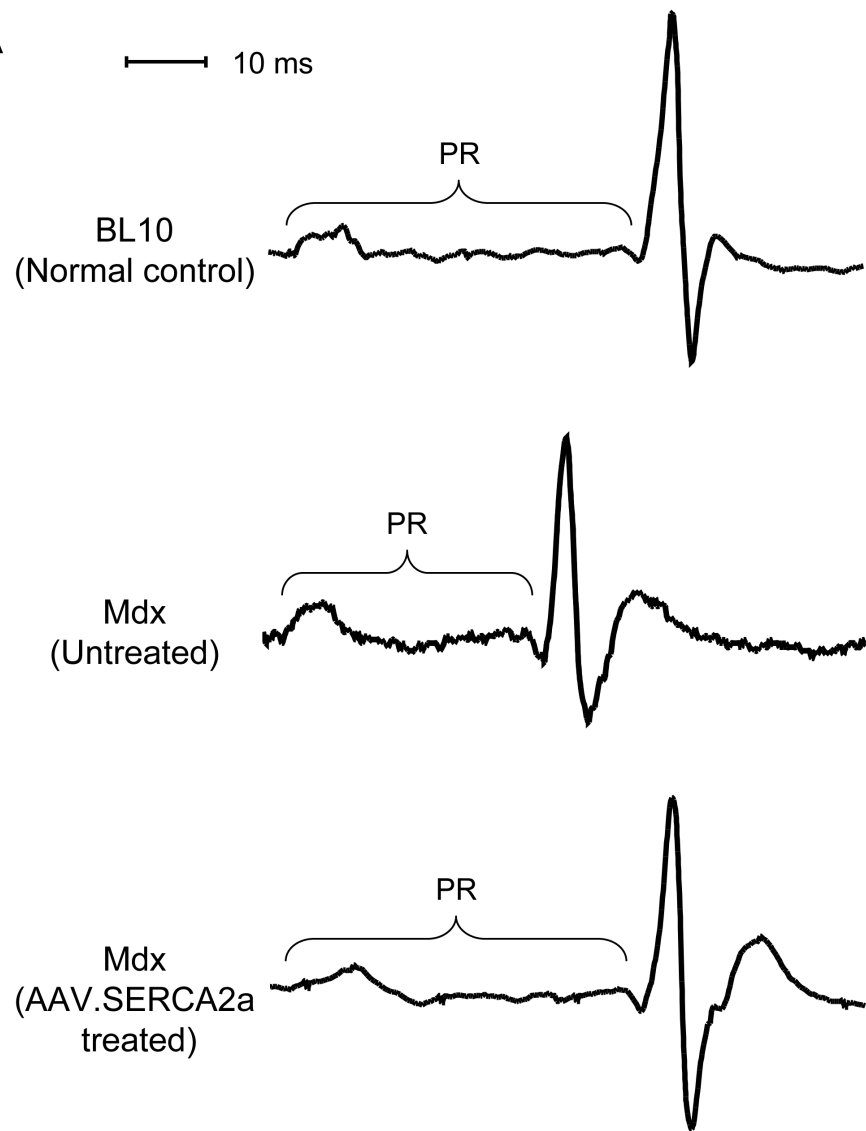**B**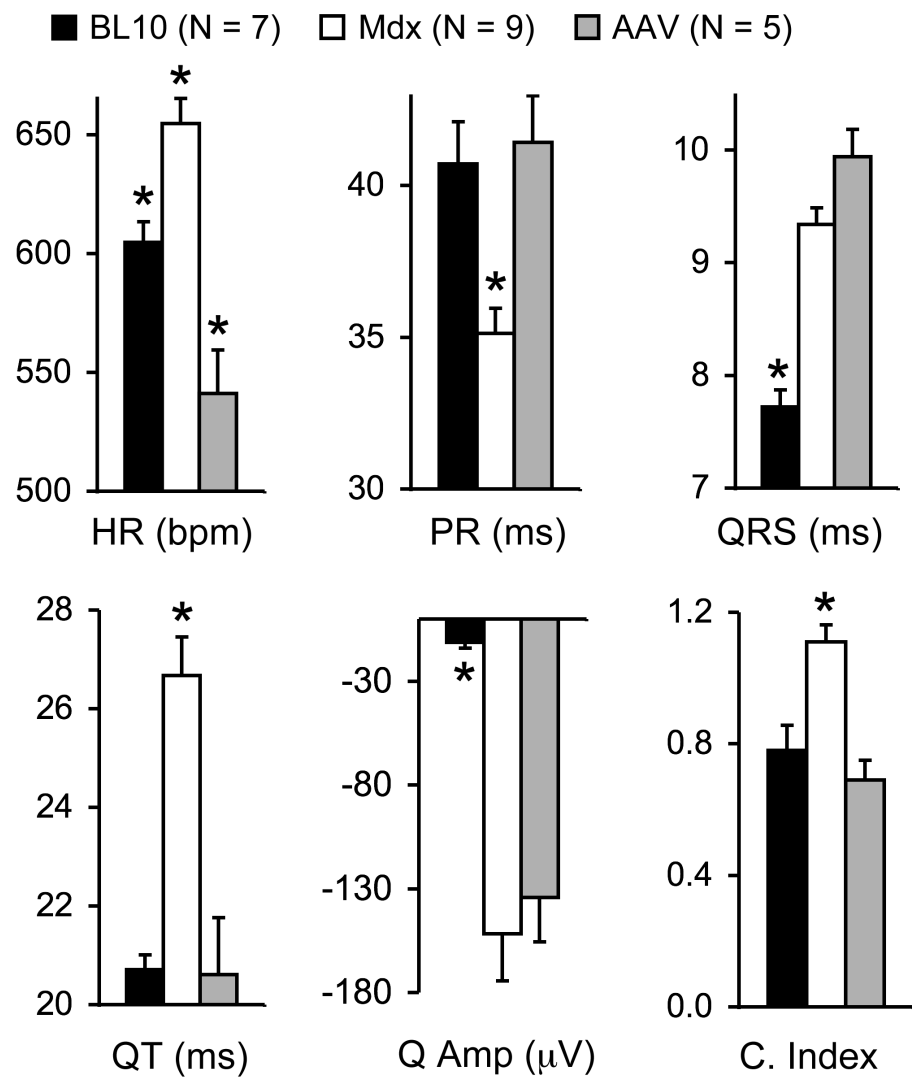

Supplement: MOESM3 [file 9577070]
